# Supplementary material
Source: publisher site journal article supplement (https://www.spandidos-publications.com/6240/downloadSupplementary)
Supplement: Supplementary file 1 [file downloadSupplementary]

## Sheet: Sheet1
Table SVI. A total of 89 differentially expressed genes were identified between the high- and low-risk groups.
Gene	lowMean	highMean	logFC	P-value	FDR
HOXA5	0.142571	2.05611	3.85017	9.02621e-17	3.37463e-15
HOTAIRM1	0.462564	2.87075	2.6337	4.13783e-08	1.95936e-07
CRNDE	0.605221	2.89559	2.25832	3.35104e-25	1.58396e-22
IGFBP2	2.70874	25.9022	3.25738	5.22284e-18	2.74303e-16
COL3A1	2.36314	19.1744	3.02041	7.40472e-17	2.84888e-15
PDPN	2.69419	20.2197	2.90784	3.42331e-17	1.43378e-15
IGLV3-21	0.260708	2.0255	2.95778	0.0196344	0.0293081
VASN	1.14904	4.79487	2.06106	1.57678e-15	4.09189e-14
DMRTA2	0.154796	2.12538	3.77928	9.64834e-07	3.47188e-06
SERPINE1	4.45021	18.8589	2.0833	4.13104e-15	9.67687e-14
COL4A1	4.62715	21.8362	2.23852	2.64269e-23	7.4417e-21
CTHRC1	0.644811	2.62632	2.02609	2.47382e-13	3.7547e-12
COL4A2	5.88176	23.831	2.01852	2.41107e-22	4.62472e-20
CA3	0.41559	4.68914	3.49609	6.66049e-11	5.70191e-10
TGFB2	2.20276	10.2022	2.2115	5.37781e-21	7.11753e-19
ANXA1	5.33097	32.9954	2.62979	4.45103e-25	2.03136e-22
PLA2G2A	0.307797	2.13686	2.79544	1.43195e-13	2.31968e-12
FAM183A	0.218449	3.21669	3.88021	8.61319e-10	5.77193e-09
IGHM	0.511468	5.11858	3.32303	1.62682e-06	5.6012e-06
PTX3	0.727579	2.99034	2.03913	9.41779e-14	1.56588e-12
IGHA1	2.70177	14.2835	2.40237	8.28249e-06	2.50959e-05
NNMT	0.764208	6.4116	3.06865	9.74059e-12	9.97035e-11
NPNT	1.24502	6.74423	2.43748	1.51685e-17	6.99496e-16
PLA2G5	1.03488	4.71944	2.18915	6.8741e-07	2.552e-06
SEPTIN14	0.00803645	2.28984	8.15447	0.0077513	0.0126652
FMOD	0.958139	12.738	3.73276	4.13785e-19	3.02566e-17
METTL7B	4.81945	28.1388	2.54562	5.81825e-22	1.05486e-19
POSTN	0.354661	9.01367	4.6676	8.11965e-11	6.81875e-10
LUM	0.766556	3.09502	2.01349	6.40293e-16	1.88317e-14
CHI3L1	7.31433	213.583	4.86793	1.70675e-22	3.42256e-20
RBP1	2.63716	11.4379	2.11676	2.15569e-09	1.33383e-08
G0S2	0.641973	3.40365	2.4065	1.04393e-12	1.36257e-11
CHI3L2	5.03287	21.7241	2.10984	1.03274e-17	5.04368e-16
COL1A1	2.08765	13.6023	2.7039	1.35268e-17	6.34849e-16
GDF15	0.299356	2.0493	2.7752	2.79214e-20	3.00438e-18
PLAU	1.4481	6.13119	2.08201	2.21508e-18	1.32654e-16
TOP2A	2.97019	12.1117	2.02778	1.34806e-14	2.82303e-13
TTR	0.0231225	240.27	13.3431	0.000832862	0.00168779
LTF	1.1895	27.0363	4.50647	3.43285e-15	8.15686e-14
ABCC3	0.264248	2.41643	3.19291	4.92827e-18	2.60903e-16
IGHG4	0.361422	1.88144	2.38008	0.000326728	0.000719972
CCDC8	0.58888	2.62428	2.15588	1.55777e-10	1.22429e-09
THBS1	0.906663	3.80837	2.07053	3.25037e-10	2.39259e-09
SAA1	0.0933745	5.15184	5.78591	3.15624e-07	1.26355e-06
TNFRSF12A	3.35883	14.3389	2.0939	1.47641e-19	1.20619e-17
SERPINA5	0.243229	2.10571	3.11392	9.41474e-26	5.19184e-23
H19	0.273277	6.51675	4.57572	5.27282e-06	1.6563e-05
AGAP2-AS1	0.77748	5.3476	2.78201	2.16683e-08	1.09e-07
SRPX2	0.945042	4.09284	2.11465	6.01679e-17	2.34903e-15
SEC61G	15.1534	70.6247	2.22053	0.000644259	0.0013346
MET	0.600881	3.27753	2.44746	2.64078e-09	1.60398e-08
C7orf57	0.177248	2.31192	3.70526	1.25359e-14	2.63361e-13
EMILIN3	0.999544	8.14858	3.02721	2.51038e-09	1.5318e-08
WDR38	0.36617	2.21758	2.5984	7.82272e-07	2.87514e-06
IL13RA2	0.889748	5.61554	2.65796	2.49859e-17	1.08422e-15
SPOCD1	1.17704	5.66677	2.26736	1.09463e-13	1.80192e-12
COL6A2	3.1081	14.5606	2.22797	9.97245e-15	2.16015e-13
MYBL2	1.56002	6.69013	2.10047	4.17698e-11	3.73277e-10
LIF	0.298228	1.90712	2.67691	8.66257e-15	1.89816e-13
FLNC	3.09444	12.5946	2.02506	1.13609e-15	3.05614e-14
KIF20A	0.517515	2.07996	2.00688	7.53485e-16	2.16321e-14
DDIT4L	0.437498	2.87509	2.71626	1.12717e-09	7.38154e-09
COL1A2	2.80208	12.6405	2.17349	1.15802e-19	9.70029e-18
LGR6	0.355475	3.38168	3.24992	4.7006e-06	1.48763e-05
TEKT1	0.385333	1.86593	2.27572	0.000701277	0.00144166
BUB1B	0.697524	2.90946	2.06044	1.23425e-13	2.0167e-12
TIMP1	10.7452	60.9816	2.50469	3.03865e-23	8.20745e-21
MEOX2	0.163466	4.16259	4.67042	0.000955535	0.00191266
HOXD9	0.38263	1.92245	2.32892	4.51887e-11	3.99781e-10
IGF2	2.73603	19.9311	2.86486	1.12009e-05	3.31938e-05
MOXD1	0.759469	6.962	3.19644	8.80129e-12	9.10751e-11
RSPH4A	0.443629	1.77768	2.00257	7.60373e-11	6.45098e-10
OTOS	0.457297	3.92163	3.10025	2.64499e-10	1.97956e-09
IBSP	0.13721	2.27026	4.04839	5.71897e-11	4.96006e-10
COL5A1	0.480013	2.2125	2.20454	3.32543e-15	7.95878e-14
AP000763.2	7.42557	1.58672	-2.22645	1.16824e-07	5.09612e-07
CXCL10	1.15997	5.26157	2.1814	5.38e-16	1.62197e-14
EMP3	2.94978	17.947	2.60507	4.29937e-20	4.20485e-18
C1orf189	0.131125	2.37433	4.1785	1.10001e-06	3.91886e-06
TNFAIP6	0.443065	2.66373	2.58786	2.47254e-23	7.11392e-21
TCTEX1D1	0.283108	3.07496	3.44114	1.17998e-12	1.52212e-11
DES	0.379969	2.46721	2.69893	7.36916e-10	5.0196e-09
FABP5	1.55573	6.60664	2.08632	8.71425e-13	1.15913e-11
JCHAIN	0.334745	2.16842	2.69551	0.00052067	0.00109923
LINC02587	0.0993789	2.93208	4.88284	6.83946e-06	2.10175e-05
MMP9	0.676838	3.15578	2.22112	6.66139e-08	3.04222e-07
AL354919.2	0.413425	1.99243	2.26883	1.49702e-12	1.8674e-11
PLAT	1.85445	9.42211	2.34506	1.87325e-28	2.33866e-25
PDLIM4	1.26367	5.57486	2.14132	1.41884e-11	1.40556e-10
FC, fold change; FDR, false discovery rate.
